# Supplementary material
Source: publisher figshare collection journal article supplement (https://springernature.figshare.com/ndownloader/files/10920506)
Supplement: Supplementary file 1 [file 10920506]

Id	Label	Owner	Role	Longitude	Latitude	ref
1	Paposo	Transelec	Switch	-69.9436702808	-25.7306077564	converted
2	Tap Off Taltal	Electrica Panguipulli	Switch	-69.9436702808	-25.7306077564	converted
3	Eolica Taltal	P.E Taltal	Plant	-69.8484638639	-25.059477202	original
4	Diego de Almagro	Transelec	Substation	-70.0388766977	-26.3979710839	original
5	Diego de Almagro	Endesa	Plant	-70.0386764329	-26.3984370693	original
6	El Salvador	SWC	Plant	-70.0395552839	-26.392251609	original
7	Emelda	Emelda	Plant	-70.0222496889	-26.3803179925	original
8	Diego de Almagro	Almeyda	Plant	-70.0194165856	-26.3795888296	original
9	Tap Chañares	Unknown	Switch	-70.0388766977	-26.3979710839	converted
10	Llanta	Codelco Chile - División Salvador	Tap-ed	-69.7994757727	-26.3291061772	original
11	Tap Llanta	Unknown	Switch	-69.8114504886	-26.3361847602	converted
12	El Salvador	Codelco Chile - División Salvador	Tap-ed	-69.5959989955	-26.2814473634	original
13	San Lorenzo	Enlasa	Plant	-70.0379576216	-26.4003538809	original
14	Carrera Pinto	Transelec	Switch	-70.0750487253	-26.8269067181	converted
15	San Andres	San Andres	Plant	-70.1112207529	-27.2542245193	original
16	Cardones	Transelec	Substation	-70.3869767493	-27.4889219288	original
17	Cardones	Central Cardones	Plant	-70.386436207	-27.487597634	original
18	Cenizas	Electrica Cenizas	Plant	-70.3897434007	-27.4809482699	original
19	Maitencillo	Transelec	Substation	-70.9244721687	-28.5347206226	original
20	Guacolda	Guacolda	Plant	-71.2572509162	-28.4673299744	original
21	Jorquera	Mineral Lumina Copper	Substation	-69.9766992985	-28.0438163986	original
22	Huasco	Transelec	Substation	-71.2525686446	-28.4704376246	original
23	Huasco	Transelec	Plant	-71.2525818536	-28.4707403626	original
24	Tap El Eden	Transelec	Switch	-70.7847785818	-28.6054763171	converted
25	Rio Huasco	Hidroelectrica Rio Huasco	Plant	-70.6450849949	-28.6761843931	original
26	Punta Colorada	Transelec	Substation	-71.047665658	-29.3669424795	original
27	Pan de Azucar	Transelec	Substation	-71.2796731929	-29.9771338864	original
28	El Peñon	Transnet	Substation	-71.2292507045	-30.1441103674	original
29	Ovalle	Transnet	Substation	-71.1873865321	-30.5967193373	original
30	Talinay Oriente	Parque Eolico Talinay	Plant	-71.5914597964	-30.8733907378	original
31	Las Palmas	Transelec	Substation	-71.5897489479	-31.2880478927	original
32	Monte Redondo	EMR	Plant	-71.6578260613	-31.0773269976	original
33	Eolica Punta Palmeras	Punta Palmeras	Plant	-71.6404194613	-31.2344808794	original
34	Canela I	Canela	Plant	-71.6023399986	-31.2883407886	original
35	Elevadora Canela II	Canela	Plant	-71.6011438932	-31.3135987789	corrected
36	Los Vilos	Transelec	Substation	-71.4776754583	-31.9387430035	original
37	Monte Patria	Transnet	Substation	-70.9554589825	-30.6905734362	original
38	Punitaqui	Transnet	Substation	-71.2433728583	-30.8561956588	original
39	Illapel	Transnet	Substation	-71.1471742601	-31.6244322923	original
40	Choapa	Transnet	Tap-ed	-71.4773651352	-31.9372459507	original
41	Los Espinos	Potencia	Plant	-71.4503012009	-31.8830065257	original
42	Nogales	Transelec	Switch	-71.2680435371	-32.7107773698	converted
43	Nueva Ventanas	Electrica Ventanas	Tap-ed	-71.4835997471	-32.7501877093	converted
44	Nueva Ventanas	AES Gener	Plant	-71.4831505895	-32.7498099502	original
45	Campiche	AES Gener	Plant	-71.4832965102	-32.7482937004	original
46	Ventanas	AES Gener	Plant	-71.4832894628	-32.7515412045	original
47	Quintero	Chilquinta	Substation	-71.4873000294	-32.7880831969	original
48	Torquemada	AES Gener	Substation	-71.4724050415	-32.9345690277	original
49	Quintero	Endesa	Plant	-71.4855418027	-32.7870742278	original
50	San Luis	Transquillota	Switch	-71.3392061827	-32.9463652807	converted
51	San Isidro	Celta	Plant	-71.338757025	-32.9459883558	original
52	Nehuenco	Colbun	Plant	-71.3231015536	-32.9366244596	original
53	Quillota	Transelec	Substation	-71.251379066	-32.9529453461	original
54	San Pedro	AES Gener	Tap-ed	-71.2645201019	-32.9361370473	original
55	Polpaico	Transelec	Substation	-70.8595198771	-33.1962646532	original
56	Pachacama	Chilquinta	Switch	-71.095649659	-32.8739582873	converted
57	Las Vegas	AES Gener	Substation	-71.0109403199	-32.8428578483	original
58	La Calera	Chilquinta	Tap-ed	-71.0528957889	-32.8582355112	converted
59	Las Vegas	Chilquinta	Plant	-71.0114885552	-32.8428472306	original
60	Esperanza	Colbun	Tap-ed	-71.0101419189	-32.8425099479	original
61	San Felipe	Chilquinta	Tap-ed	-71.0108152371	-32.8426785894	converted
62	San Rafael	Chilquinta	Tap-ed	-70.642334225	-32.8540809116	converted
63	Totoralillo	Colbun	Tap-ed	-70.5056865025	-32.8539276889	original
64	Chacabuquito	Colbun	Plant	-70.5061384278	-32.8534803032	original
65	Los Maquis	Colbun	Tap-ed	-70.4105009354	-32.8656349714	original
66	Aconcagua	Colbun	Tap-ed	-70.3580660138	-32.9418518337	converted
67	Los Quilos	Colbun	Plant	-70.4079816058	-32.8664931449	original
68	Los Vientos	AES Gener	Plant	-71.0128466255	-32.8438607769	original
69	Hornitos	Rio Tranquilo	Plant	-70.2633388463	-32.9005715538	original
70	SAG	Codelco Chile	Substation	-70.2557090892	-33.0927816976	original
71	Tap El Llano	Colbun	Switch	-70.5637409706	-33.0942672557	original
72	Agua Santa	Chilquinta	Substation	-71.5422416106	-33.0765697685	original
73	Miraflores	Chilquinta	Substation	-71.5255100542	-33.0344953167	original
74	Placilla	Chilquinta	Plant	-71.5590607839	-33.1084615129	original
75	Tap Achupallas	Chilquinta	Switch	-71.5159981116	-33.0332186789	original
76	Concon (PMG)	Tecnored	Plant	-71.4742286582	-32.9331165216	original
77	Concon	Chilquinta	Tap-ed	-71.5162879001	-32.9344326135	original
78	Colmito	Termoelectrica Colmito	Plant	-71.4740239248	-32.9303690357	original
79	Los Maitenes	Anglo American Sur	Tap-ed	-70.3578780214	-33.3048672161	original
80	La Ermita	Anglo American Sur	Tap-ed	-70.3529194399	-33.4113375591	converted
81	Alfalfal	AES Gener	Plant	-70.1926517347	-33.501244004	original
82	Los Almendros	Chilectra	Substation	-70.5082285636	-33.4277881555	original
83	Maitenes	AES Gener	Plant	-70.2616705541	-33.5306985354	original
84	Alfalfal	AES Gener	Substation	-70.1925190166	-33.5014100565	original
85	La Laja	AES Gener	Switch	-70.4197030649	-33.581176077	original
86	Alto Jahuel	Transelec	Substation	-70.6920464333	-33.7139475885	original
87	Lampa	Chilectra	Substation	-70.7574401064	-33.3188140251	original
88	Cerro Navia	Transelec	Substation	-70.729953124	-33.4224556893	original
89	Seccionadora lo Aguirre	Transelec	Tap-ed	-70.881898066	-33.5053101328	converted
90	Alto Melipilla	Chilquinta	Substation	-71.2460728297	-33.6875392503	original
91	Rapel	Transelec	Substation	-71.5849732939	-34.0381144827	original
92	Chena	Transelec	Substation	-70.7256986048	-33.5264058539	original
93	Cerro Navia	Chilectra	Tap-ed	-70.7304022817	-33.4228305698	converted
94	San Pablo	Chilectra	Tap-ed	-70.8145223826	-33.4321254283	converted
95	Lo Aquirre	Chilectra	Substation	-70.8986424836	-33.4414192915	original
96	Maipu	Chilectra	Substation	-70.7327863714	-33.5152147285	original
97	Chena	Chilectra	Tap-ed	-70.7300117126	-33.5277975644	original
98	Lo Espejo	Chilectra	Switch	-70.7111437776	-33.5897782543	converted
99	Lo Espejo (FFCC)	EFE	Substation	-70.7111641648	-33.5303049598	original
100	Ochagavia	Chilectra	Substation	-70.667516184	-33.4794970934	original
101	Renca	Chilectra	Substation	-70.689381179	-33.4171836332	original
102	Nueva Renca	AES Gener	Plant	-70.6869681356	-33.4183577352	original
103	Renca	AES Gener	Plant	-70.6885703425	-33.417289457	original
104	San Cristobal	Chilectra	Substation	-70.6393387182	-33.4272966327	original
105	El Salto	Chilectra	Substation	-70.6286241716	-33.3591688306	original
106	Batuco	Chilectra	Substation	-70.7308524627	-33.2676026901	original
107	Punta Peuco	AES Gener	Tap-ed	-70.8259850822	-33.1189320451	original
108	Punta Peuco	Cemento Polpaico	Substation	-70.8271384376	-33.1189833127	original
109	Polpaico	Chilectra	Substation	-70.8265884991	-33.1187843163	original
110	Florida (SCM)	Puntilla	Plant	-70.5453536894	-33.5475821135	original
111	Florida	Chilectra	Switch	-70.5458028471	-33.5479564528	converted
112	El Rincon	Puntilla	Plant	-70.5430030463	-33.5480352958	original
113	Vizcachas	EEPA	Tap-ed	-70.5076093522	-33.579061484	converted
114	Puente Alto	EEPA	Substation	-70.5573221445	-33.6080414261	original
115	Puntilla	Puntilla	Plant	-70.5351858217	-33.6187184396	original
116	Queltehues	AES Gener	Plant	-70.2193299746	-33.8127964452	original
117	Volcan	AES Gener	Plant	-70.214827632	-33.8206461317	original
118	Buin	Chilectra	Substation	-70.6922554555	-33.7111040331	original
119	Pirque	Transnet	Substation	-70.5570750745	-33.6299639432	corrected
120	Maipo	Colbun	Tap-ed	-70.6915959932	-33.7159917085	original
121	Candelaria	Colbun	Switch	-70.6136283831	-34.0346308654	corrected
122	San Antonio	Chilquinta	Tap-ed	-71.6034829964	-33.6015149162	original
123	Paine	Transnet	Substation	-70.7511324335	-33.8244654177	original
124	Fatima	Unknown	Tap-ed	-70.7284269797	-33.8010375038	converted
125	Tap Hospital	Unknown	Switch	-70.7421020724	-33.8646284002	original
126	Las Arañas	Transnet	Tap-ed	-71.4133888115	-33.9082265341	original
127	Quelentaro	Transnet	Tap-ed	-71.5863972926	-34.0404151958	original
128	Portezuelo	Transnet	Tap-ed	-71.6127844771	-34.3477966743	original
129	Reguladora Rapel	Transnet	Tap-ed	-71.5840059334	-34.039342191	original
130	Rapel	Endesa	Plant	-71.5902478436	-34.0409484792	original
131	La Esperanza	Transnet	Substation	-71.5406029	-34.311577	corrected
132	Tap Tuniche	Unknown	Switch	-70.752441497	-33.9726214377	converted
133	Ancoa	Transelec	Substation	-71.378769157	-35.6840939794	original
134	Sauzal	Transelec	Substation	-70.6325687459	-34.2517133945	original
135	Tap Punta de Cortes	Transnet	Switch	-70.8403726655	-34.1845651126	converted
136	Punta de Cortes	Transnet	Substation	-70.8399235079	-34.1841935543	original
137	Tuniche	Transnet	Substation	-70.7540389083	-34.1198926455	original
138	Rancagua	Transelec	Substation	-70.7262144557	-34.1665002987	original
139	Alameda	Transnet	Tap-ed	-70.7830689818	-34.1753473902	converted
140	San Francisco de Mostazal	Transnet	Substation	-70.7020458701	-33.9817554452	original
141	Graneros	Transnet	Substation	-70.7100623297	-34.0612266583	original
142	Graneros Indura	Indura	Substation	-70.71104	-34.06396	corrected
143	Sauzal	Endesa	Plant	-70.5474037887	-34.2366633953	original
144	Interconexion	HCSA PHCH	Tap-ed	-70.5261547165	-34.2052935803	converted
145	Chacayes	Pacific Hydro Chacayes	Plant	-70.4522666792	-34.2755581762	original
146	Coya	HCSA	Plant	-70.5257055589	-34.2049221133	original
147	T7	HCSA PHCH	Switch	-70.5261547165	-34.2052935803	converted
148	Minero	Codelco Chile	Tap-ed	-70.4736873135	-34.0898451018	original
149	Candelaria	Colbun	Plant	-70.6138087859	-34.0338620077	original
150	Colbun	Colbun	Plant	-71.3698510555	-35.6853402114	original
151	Minera Valle Central	Minera Valle Central	Plant	-70.6743617929	-34.2425145745	original
152	Tap Maestranza	Unknown	Switch	-70.7262144557	-34.1665002987	converted
153	Tap Los Lirios	Transnet	Switch	-70.8086293108	-34.3196396869	converted
154	Malloa Nueva	Transnet	Tap-ed	-70.8892525422	-34.4655423915	converted
155	Pelequen	Transnet	Tap-ed	-70.891044166	-34.472500167	original
156	Tap La Paloma	Unknown	Switch	-70.9525805933	-34.5577083621	original
157	Malloa	Transnet	Substation	-70.9595556558	-34.4606904607	original
158	Quinta de Tilcoco	Transnet	Substation	-70.9703607202	-34.364156774	original
159	La Ronda	Transnet	Tap-ed	-70.9593954049	-34.5583547894	original
160	Tinguiririca	Transelec	Switch	-70.7147866411	-34.7519092204	converted
161	San Fernando	Transnet	Substation	-70.9833991429	-34.5979272566	original
162	La Higuera	Pacific Hydro	Plant	-70.7143374834	-34.7515401791	original
163	Teno Empalme	Transnet	Tap-ed	-71.1661694648	-34.8539007965	original
164	Teno	Transnet	Substation	-71.1416671792	-34.8685636567	original
165	Teno	Enlasa	Plant	-71.1419324598	-34.8685560069	original
166	Itahue	Transelec	Substation	-71.3674326153	-35.1396350165	original
167	Los Maquis	Transnet	Tap-ed	-71.6602315786	-35.1649669039	converted
168	Panguilemo	Transnet	Tap-ed	-71.5933243125	-35.3666281102	original
169	Talca	Transnet	Substation	-71.6399736674	-35.4374904611	original
170	San Miguel	Transnet	Substation	-71.6166847696	-35.439792567	original
171	Maule	Transnet	Substation	-71.5300560943	-35.4999808254	original
172	Lircay	Hidromaule	Plant	-71.2613552647	-35.5372508006	original
173	Curillinque	Pehuenche	Plant	-70.9410821351	-35.8051125751	original
174	Cipreses	Endesa	Plant	-70.8083703952	-35.7872181968	original
175	Isla	Endesa	Plant	-70.835695195	-35.8104223778	original
176	Charrua	Transelec	Substation	-72.3208141857	-37.0907869384	original
177	Pehuenche	Transelec	Switch	-71.1559130599	-35.7341172797	converted
178	Canal Melado	Transelec	Tap-ed	-71.0673259181	-35.7942789924	converted
179	Pehuenche	Pehuenche	Plant	-71.1554639023	-35.7337526815	original
180	Loma Alta	Pehuenche	Plant	-70.9821703252	-35.7908645835	original
181	Los Hierros	Aguas Del Melado	Plant	-71.0638943692	-35.8578068658	original
182	Machicura	Colbun	Plant	-71.3979441371	-35.7324308035	original
183	Chiburgo	Colbun	Plant	-71.3550619097	-35.661455093	original
184	San Clemente	Colbun	Plant	-71.3556441822	-35.598156176	original
185	Constitucion 1 y Maule	Elektragen	Plant	-72.4068630554	-35.3603946551	original
186	Constitucion	Transnet	Substation	-72.4027163506	-35.3637005831	original
187	Viñales	Paneles Arauco	Plant	-72.4107645058	-35.3710923295	original
188	Linares	Transnet	Substation	-71.6282960961	-35.845150581	original
189	Tap Longavi	Transnet	Switch	-71.7167661704	-35.9893902274	converted
190	Parral	Transnet	Substation	-71.8052362446	-36.133366638	original
191	San Gregorio	Luzparral	Tap-ed	-71.8188417742	-36.278257474	original
192	San Gregorio	Tecnored	Plant	-71.81877225	-36.2788154389	original
193	Monterrico	Transnet	Tap-ed	-72.0617740084	-36.6120982449	original
194	Tap el Nevado	Unknown	Switch	-72.0810777021	-36.6060766697	original
195	Santa Elvira	Transnet	Substation	-72.0988309032	-36.5962923068	original
196	Nueva Aldea	Arauco Generacion	Plant	-72.473097438	-36.6597129141	original
197	Chillan	Transnet	Substation	-72.0930411693	-36.6252556657	original
198	Quilmo	Copelec	Tap-ed	-72.2069276775	-36.8583757585	converted
199	Lajuelas	Unknown	Switch	-72.2069276775	-36.8583757585	converted
200	Cholguan	Paneles Arauco	Plant	-72.0674192525	-37.1648793161	original
201	Concepcion	Transelec	Tap-ed	-72.8264613159	-36.8812702619	converted
202	Penco	Transnet	Tap-ed	-72.944695202	-36.8017877515	converted
203	Alonso de Ribera	Transnet	Tap-ed	-73.0337001872	-36.8053093299	original
204	Lirquen Indura	Indura	Substation	-72.9739241029	-36.7186972689	original
205	San Vicente	Transelec	Substation	-73.1248695749	-36.7472710533	original
206	Hualpen	Transelec	Substation	-73.1218306456	-36.7883906127	original
207	Petropower	Petropower	Plant	-73.1217079388	-36.7872845042	original
208	Lagunillas	Transelec	Substation	-73.1355762271	-36.9883240455	original
209	Ejercito	Transnet	Tap-ed	-72.97782814	-36.8368257817	converted
210	Cerro Chepe	Unknown	Switch	-73.0733229169	-36.8238772452	original
211	Loma Colorada	Transnet	Tap-ed	-73.1268682042	-36.9228741198	converted
212	Coronel	Transnet	Substation	-73.152078862	-37.0099081927	original
213	Escuadron	Transnet	Tap-ed	-73.1552028336	-36.9347220939	original
214	Coronel	Sagesa	Plant	-73.1685813815	-36.9675605587	original
215	Tap Polpaico	Unknown	Switch	-73.1711402482	-36.9768783711	original
216	Bocamina	Endesa	Plant	-73.1673118785	-37.021477934	original
217	FPC	Transelec	Tap-ed	-73.1560547031	-36.935347761	converted
218	Escuadron	Nueva Energia	Plant	-73.1556055454	-36.9349887421	original
219	Mapal	Masisa	Substation	-73.1411741462	-36.8674493536	original
220	Arauco	Celulosa Arauco	Plant	-73.222178696	-37.2091968159	original
221	Horcones	Transnet	Substation	-73.2162971114	-37.2124518041	original
222	Horcones	Arauco Bioenergia	Plant	-73.2167423439	-37.211800927	original
223	Santa Maria	Colbun	Plant	-73.1300237794	-37.0419972981	original
224	Santa Lidia	AES Gener	Plant	-72.3164442238	-37.0930229782	original
225	Los Pinos	Colbun	Plant	-72.3247443837	-37.085435716	original
226	Cholguan	STS	Substation	-72.071277589	-37.1614420628	original
227	Pangue	Celta	Plant	-71.6086833375	-37.9098682325	original
228	Tap Trupan	Transelec	Switch	-71.8519712529	-37.4377953324	converted
229	Antuco	Endesa	Plant	-71.6264162354	-37.3103219792	original
230	El Toro	Endesa	Plant	-71.4924130083	-37.2933632021	original
231	Zona de Caida	Palmucho	Tap-ed	-71.5133967146	-37.9992685721	original
232	Ralco	Endesa	Plant	-71.5199021008	-37.9969324489	original
233	Quilleco	Colbun	Plant	-71.9567386365	-37.3359615769	original
234	Rucue	Colbun	Plant	-71.8657270376	-37.3603337386	original
235	Mampil	Dei Duqueco	Plant	-71.7098204	-37.5403667572	original
236	Peuchen	Dei Duqueco	Plant	-71.5964566692	-37.5404478846	original
237	Tap Duqueco	Transnet	Switch	-72.3226488785	-37.5183536443	original
238	Mulchen	Conbun	Substation	-72.2546136989	-37.6815381718	original
239	Tap Off El Rosal	EMR	Tap-ed	-72.3494021888	-37.2484763637	original
240	Laja 1	EMR	Plant	-72.530612067	-37.2449261885	original
241	Yungay	Duke Energy	Plant	-72.2933104591	-37.1054882983	original
242	Abanico	Endesa	Plant	-71.4893944925	-37.3645526252	original
243	Tap Maria Dolores	Unknown	Switch	-72.5161015304	-37.1902226484	converted
244	Celulosa Laja	CMPC Celulosa	Plant	-72.711388875	-37.2895275903	original
245	Los Angeles	Transnet	Tap-ed	-72.3682522268	-37.4810250968	original
246	Renaico	Mainco	Plant	-72.4155448774	-37.8138355616	original
247	Angol	Transnet	Tap-ed	-72.657591055	-37.8231718293	original
248	Lautaro	Transnet	Substation	-72.4612955172	-38.5413615936	original
249	Lautaro	Comasa	Plant	-72.4674285287	-38.5418527419	original
250	Pillanlelbun	Transnet	Substation	-72.471618765	-38.6365352205	original
251	Temuco	Transelec	Substation	-72.5579484374	-38.7081581675	original
252	Celulosa Santa Fe	CMPC Celulosa	Plant	-72.6518888768	-37.5144443176	original
253	Papelera Inforsa	Papelera Rio Vergara	Tap-ed	-72.5507190158	-37.4991970688	converted
254	Celulosa Pacifico	CMPC Celulosa	Plant	-72.4841666404	-37.7917109799	original
255	Angostura	Colbun	Plant	-71.816859452	-37.710261844	original
256	Cautin	Transelec	Substation	-72.5416722483	-38.7227282058	original
257	Valdivia	Transelec	Substation	-73.1870007236	-39.799903008	original
258	Ciruelos	Transelec	Substation	-72.9115592755	-39.5500959614	original
259	Planta Valdivia	Celulosa Arauco	Plant	-72.9006995977	-39.5635484139	original
260	Padre Las Casas	Transnet	Tap-ed	-72.6079614716	-38.7743060697	original
261	Pullinque	Transnet	Plant	-72.2174508857	-39.5956718658	original
262	Los Lagos	STS	Tap-ed	-72.8043499857	-39.864945377	original
263	Calle Calle	Sagesa	Plant	-73.1890721243	-39.7999211791	original
264	Antilhue	Colbun	Plant	-73.1851765638	-39.8008711744	original
265	Osorno	STS	Tap-ed	-73.1137034735	-40.5681582345	original
266	La Union	STS	Tap-ed	-73.064835422	-40.2916498692	original
267	Pilauco	STS	Tap-ed	-73.0880703986	-40.4790430108	converted
268	Pilmaiquen	Electrica Panguipulli	Plant	-72.649672274	-40.6380952491	original
269	Rahue	Transelec	Switch	-72.9856627837	-40.5898973551	converted
270	Pichirrahue	Transrucatayo	Switch	-72.9479660865	-40.6272327445	converted
271	Rucatayo	Transrucatayo	Plant	-72.7038154419	-40.6191320288	original
272	Puerto Montt	Transelec	Substation	-72.9530820941	-41.4524387587	original
273	Antillanca	STS	Tap-ed	-72.7144979184	-40.6178577518	original
274	Lican	EE Lican	Plant	-72.401399818	-40.6180008868	original
275	Capullo	Capullo	Plant	-72.3999407496	-40.8191914428	original
276	Rio Bonito	STS	Tap-ed	-72.4095947453	-40.9093785262	original
277	Nalcas	Hidronalcas	Plant	-72.3400681442	-40.8951839075	original
278	Callao	Hidronalcas	Plant	-72.3382021868	-40.8878451543	original
279	Barro Blanco	STS	Tap-ed	-73.0856723004	-40.5769294964	original
280	Chuyaca	Sagesa	Plant	-73.088412642	-40.5786454473	original
281	Melipulli	STS	Tap-ed	-72.950775208	-41.4469604193	original
282	Chiloe	STS	Substation	-73.7117467669	-42.1434627689	original
283	Degan	STS	Substation	-73.7126285964	-42.1414746399	original
284	Degan	Unknown	Plant	-73.713077754	-42.1418076851	converted
285	Quellón	STS	Plant	-73.6142934474	-43.0913296312	original
286	Chonchi	STS	Substation	-73.8040191854	-42.6240069158	original
287	Canutillar	Colbun	Plant	-72.3416577885	-41.5280512093	original
288	Ancud	STS	Substation	-73.7955423614	-41.8771592029	original
289	San Andres	H San Andres	Plant	-70.3825410332	-34.7346591851	original
290	Carena	EE Inductrial	Plant	-70.9528027015	-33.5285691478	original
291	SDGx01	SDGx01	Plant	-71.0924813827	-30.2271628532	original
292	Pid Pid	STS	Substation	-73.7712334578	-42.4115975853	original
293	Eolica Cuel	Parque Eolico Negrete	Plant	-72.493707999	-37.5107242332	original
294	Santa Rosa	Transnet	Substation	-71.3120898363	-33.9897436305	original
295	Tap El Manzano	Unknown	Switch	-71.6360326491	-33.3802073561	original
296	El Totoral (PMG)	Tecnored	Plant	-71.6368780538	-33.4274216112	original
297	Bajo Melipilla	Transnet	Tap-ed	-71.2033115515	-33.6976152795	original
298	Guayacán	E Coyanco	Plant	-70.3596616977	-33.6026817595	original
299	San Javier	Transnet	Substation	-71.71172055	-35.5887402617	original
300	Solar Loma Los Colorados	KDM	Plant	-70.804346514	-32.9556867229	original
301	Apoquindo	Chilectra	Substation	-70.5645884959	-33.4098646736	original
302	Los Molles	Endesa	Plant	-70.5875061431	-30.7446622086	original
303	Mariposas	Hidrolircay	Plant	-71.2641676839	-35.5960523718	original
304	Santa Rosa Sur	Chilectra	Substation	-70.5979086927	-33.5818693577	original
305	Trapen	Enlasa	Plant	-73.0768276005	-41.517726814	original
306	Tap Renaico	Transnet	Switch	-72.5802802428	-37.6756529995	original
307	Newen	Gas Sur	Plant	-73.1127298517	-36.7754880657	original
308	Taltal	Elecda	Substation	-70.473818127	-25.4130051187	original
309	Providencia	Hidroprovidencia	Plant	-71.2728826323	-35.4696876898	original
310	Llano de Llampos	Amanecer Solar	Plant	-70.1711434012	-27.1174606208	original
311	Punta Colorada	Barrick Generacion	Plant	-71.0585306628	-29.3662216022	original
312	Molinos	Codelco Chile	Substation	-70.2557155003	-33.0932326011	original
313	San Ignacio	Colbun	Plant	-71.5413000695	-35.6146176896	original
314	Tap Algarrobo	Chilquinta	Tap-ed	-71.5934869567	-33.3680836277	original
315	Totoral 1	Norvind	Plant	-71.6110342975	-31.3255998584	original
316	Eólica Lebu	Parque Eólico Lebu	Plant	-73.6491305965	-37.686072186	original
317	Licanten	Arauco Generacion	Plant	-72.0199378079	-34.9881912236	original
318	Palmucho	Endesa	Plant	-71.47134997	-38.0452081119	original
